# Supplementary material
Source: publisher figshare collection journal article supplement (https://tandf.figshare.com/ndownloader/files/17796947)
Supplement: Supplementary file 1 [file 17796947]

**Ibrahim Yahaya Wuni** is a PhD student at the Department of Building and Real Estate of the Hong Kong Polytechnic University. Ibrahim is an awardee of the Hong Kong PhD Fellowship Scheme funded by the Hong Kong Research Grants Council. Mr. Wuni does research on modular integrated construction, off-site construction, risk management, decision support systems, decision science, benchmarking, and sustainable construction. He can be contacted through email: [ibrahim.wuni@connect.polyu.hk](mailto:ibrahim.wuni@connect.polyu.hk)

**Professor Geoffrey Qiping Shen** is a Chair Professor of Construction Management at the Department of Building and Real Estate of the Hong Kong Polytechnic University. Prof. Shen is also the Academic Discipline Leader of Construction and Real Estate Management. Prof. Shen does research on construction project management, stakeholder management, industrialized construction, construction information technology, sustainable construction, collaborative working in construction, value management and partnering, prefabrication, modular integrated construction and off-site construction. He can be contacted through email: [geoffrey.shen@polyu.edu.hk](mailto:geoffrey.shen@polyu.edu.hk)
